# Supplementary material for: Television's role in Climate Change Communication – Salience and Audiences
Source: Research Square preprint supplement (doi:10.21203/rs.3.rs-6507182/v1), 2025-05-12
Supplement: Supplementary file 1 [file 3b3ff76c1f7874b1fd0af885.pdf]

## Supplementary information

*Table S1: Validated keywords to measure the salience of climate change*

| <b>Keywords climate change (validated)</b> |                                           |
|--------------------------------------------|-------------------------------------------|
| <b>Original German</b>                     | <b>English Translation</b>                |
| Klimawandel                                | Climate change                            |
| Globale Erwärmung                          | Global warming                            |
| Treibhauseffekt                            | Greenhouse effect                         |
| CO2 Emissionen                             | CO2 emissions                             |
| Temperaturanstieg                          | Temperature rise                          |
| Klimaveränderung                           | Climate change                            |
| Klimaänderung                              | -                                         |
| Klimakrise                                 | Climate crisis                            |
| Klimakatastrophe                           | Climate catastrophe                       |
| Klimanotstand                              | Climate emergency                         |
| Klimasystem                                | Climate system                            |
| IPCC                                       | IPCC                                      |
| Weltklimarat                               | Intergovernmental Panel on Climate Change |
| CO2                                        | CO2                                       |
| Kohlenstoffdioxid                          | Carbon dioxide                            |
| Fossil* fossile Energieträger              | Fossil* fossil fuels                      |
| Fossile Brennstoffe                        | -                                         |
| CO2-Fußabdruck                             | CO2 footprint                             |
| Kyoto-Protokoll                            | Kyoto Protocol                            |
| Paris-Agreement                            | Paris Agreement                           |
| Pariser Abkommen                           | -                                         |
| COP / Klimakonferenz / Klimagipfel         | COP / Climate Conference / Climate Summit |
| Klimapolitik                               | Climate policy                            |
| Klima                                      | Climate                                   |
| Meeresspiegel* Anstieg des Meeresspiegels  | Sea level* Sea level rise                 |
| Klimaschutz                                | Climate protection                        |
| 1,5 Grad Ziel / 2 Grad Ziel                | 1.5 degree target / 2 degree target       |
| 1,5 Grad / 2 Grad                          | 1.5 degree / 2 degree                     |

*Table S2: Extended keywords adapted to the field period to measure the salience of climate change*

| <b>Keywords climate change (extended)</b> |                                              |
|-------------------------------------------|----------------------------------------------|
| <b>Original German</b>                    | <b>English Translation</b>                   |
| Heißzeit                                  | Hot season                                   |
| Kipppunkte                                | Tipping points                               |
| Erderwärmung / Erderhitzung               | Global warming / global heating              |
| Extremwetter / Extremwetterereignisse     | Extreme weather / extreme weather events     |
| Anthropogen / Anthropogener Klimawandel   | Anthropogenic / Anthropogenic climate change |
| Klimaforschung                            | Climate research                             |
| Planetare Grenzen / Planetary Boundaries  | Planetary Boundaries                         |
| Klimamodelle                              | Climate models                               |
| Klimaszenarien / *Szenarien               | Climate scenarios / * scenarios              |
| CO2-Speicherung                           | -                                            |
| Carbon Capture                            | Carbon Capture                               |
| Mitigation                                | mitigation                                   |
| Adaptation                                | adaptation                                   |
| UN-Klimaschutzkonvention                  | UN Convention on Climate Change              |

Table S3: Coding of formats for the manual categorization (slightly adapted) <sup>1</sup>

| Television programme | Standard formats                 | Reality formats            |
|----------------------|----------------------------------|----------------------------|
| Fiction (1)          | Cinema films                     |                            |
|                      | Television films                 |                            |
|                      | Television series                |                            |
|                      | Daily Soaps / Telenovela         |                            |
| Reality formats (2)  |                                  | Fictionalised:             |
|                      |                                  | Scripted docu-soaps        |
|                      |                                  | Scripted courtroom shows   |
|                      |                                  | and personal-help-shows    |
| Show formats (3)     | Quiz and entertainment shows     | Performative:              |
|                      | Late Night, Comedy, Satire shows | Casting formats            |
|                      | Cookery shows                    | Coaching formats           |
|                      | Music programme                  | Improvisation formats      |
|                      | Animal programme                 | Person search formats etc. |
|                      |                                  |                            |
| Information (4)      | News                             | Daily talks                |
|                      | Magazines                        |                            |
|                      | Reports                          |                            |
|                      | Documentations                   |                            |
|                      | Interview and talk formats       |                            |
|                      | Sports                           |                            |

*Table S4: Data-driven keywords to measure the salience of top 7 issues on the media agenda (beside climate change)*

| <b>Theme</b>                         | <b>Keywords</b>                                                                                                                                                                                                                                                |
|--------------------------------------|----------------------------------------------------------------------------------------------------------------------------------------------------------------------------------------------------------------------------------------------------------------|
| War<br>(Ukraine, Russia)             | ukraine, ukrainisch krieg, russland, russisch; Angriffskrieg, Putin, Selenskyj, Saporischschja, Cherson, Streitkräfte, Militär, Truppen, NATO, Noworossijsk, Waffenlieferung, Gazprom                                                                          |
| Personal Finance<br>(Wages, prices)  | preis, preise, kosten, löhne, inflation, preise, lohne, gehalter, lohnsteigerung, lebenshaltungskosten, mindestlohn, lohndumping, preissteigerung, inflation, kaufkraft, tarifverhandlungen, lohngleichheit                                                    |
| Economic Status<br>(Wirtschaftslage) | wirtschaft, konjunktur, rezession, boom, wachstum, inflation, deflation, arbeitsmarkt, arbeitslosigkeit, export, import, bruttoinlandsprodukt, investitionen                                                                                                   |
| Energy                               | gas, energie, strom, versorgung, erneuerbare energien, fossile brennstoffe, solarenergie, windenergie, wasserkraft, atomenergie, energiepolitik, energiewende, energieeffizienz, energiesparen, energieverbrauch, stromnetz, strompreise, energieverversorgung |
| Immigration                          | ausländer, integration, flüchtlinge, migration, asyl, migrationspolitik, einwanderung, ausländerfeindlichkeit, kulturintegration, sprachintegration, arbeitsintegration, flüchtlingsunterkünfte, sozialleistungen, rückführung, multikulturalität              |
| Social Cohesion                      | soziales gefälle, soziale ungleichheit, armut, reichtum, einkommensverteilung, chancengleichheit, sozialer aufstieg, bildungsungleichheit, gesundheitsungleichheit, wohnsituation, sozialhilfe, armutsgrenze, soziale mobilität                                |

*Table S6: Names of the television channels in the sample*

| <b>Name of the television channel</b>                          |
|----------------------------------------------------------------|
| <b>RTL Group (Commercial Broadcasting)</b>                     |
| RTL Television                                                 |
| RTLZWEI                                                        |
| SUPER RTL                                                      |
| VOX                                                            |
| ntv                                                            |
| <b>Seven.One Entertainment Group (Commercial Broadcasting)</b> |
| SAT.1                                                          |
| ProSieben                                                      |
| Kabel Eins                                                     |
| <b>Sendergruppe ZDF (Public Service Broadcasting)</b>          |
| ZDF                                                            |
| 3sat                                                           |
| KIKA                                                           |
| ZDFinfo                                                        |
| ZDF neo                                                        |
| <b>Sendergruppe ARD (Public Service Broadcasting)</b>          |
| Das Erste                                                      |
| BR Fernsehen Süd                                               |
| WDR Köln                                                       |
| SWR Fernsehen BW                                               |
| rbb Berlin                                                     |
| NDR FS HH                                                      |
| MDR Sachsen                                                    |

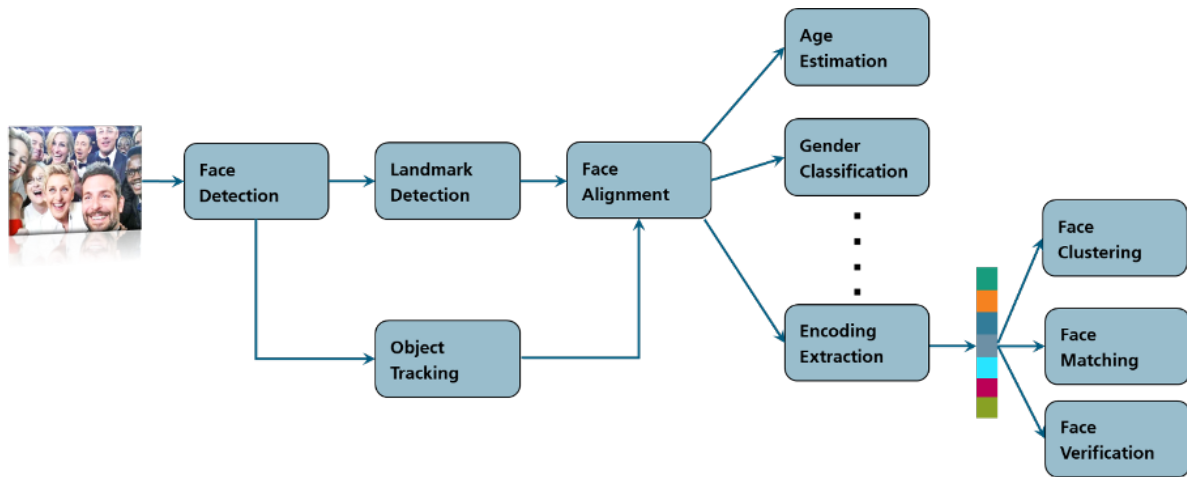

Figure S1: Simplified schematic representation of the applied facial analysis pipeline.

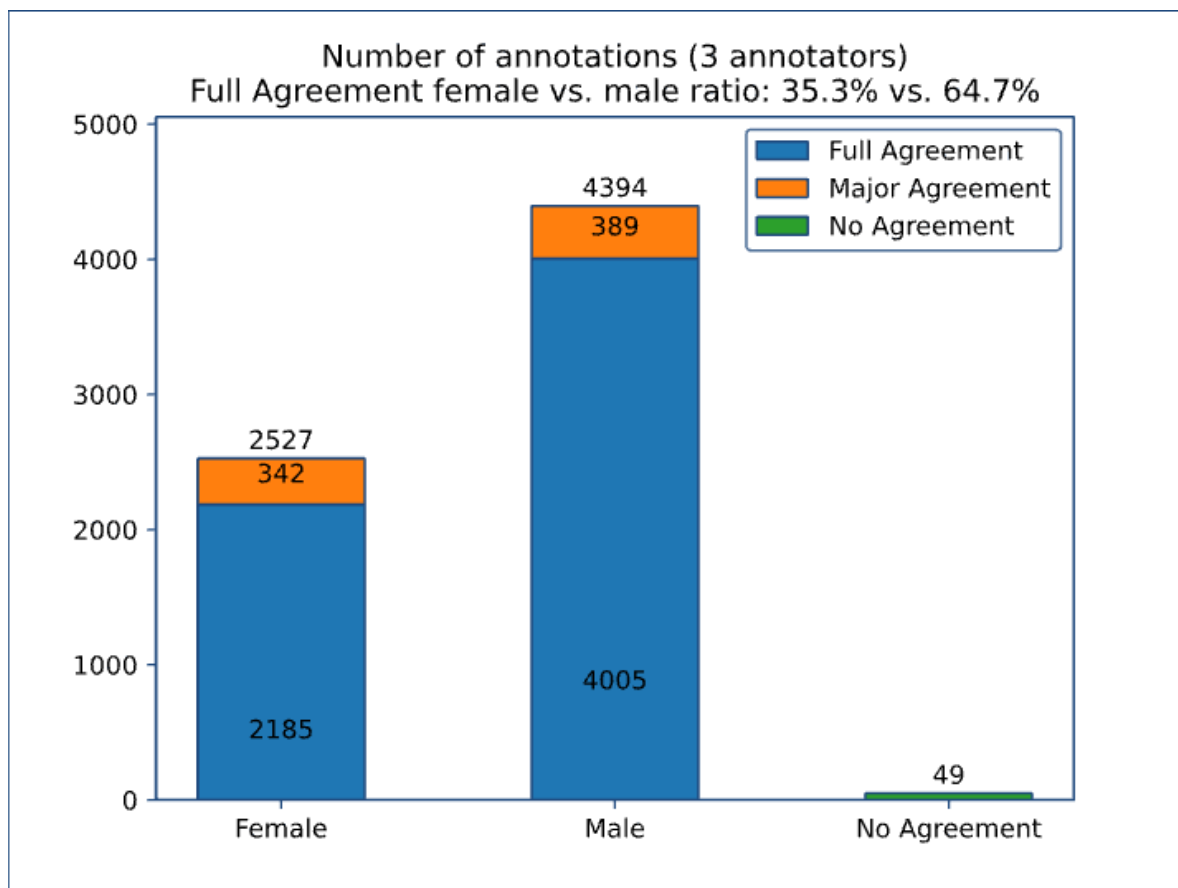

*Figure S2: Dataset statistics. Ratio of full agreement (blue) vs. major agreement (orange) vs. no agreement (green) of annotations done by at least 3 annotators for male and female. In total, 6.190 images were annotated with full agreement (blue bars): 2.185 images (35.3%) were annotated as female while 4.005 (64.7%) images were annotated as male. For the female class the interrater-reliability is 86%, while for the male class the interrater-reliability is 91%. No agreement was found for only 49 images which is 0,7% of the entire dataset of n=6.970 annotated images.*

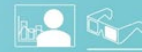

## Background and Statistics

Select Stations:  Diagram display: per date ☒ per station ☐ Diagram appearances: face ☒ voice ☐

Set date range:

| Programme Summary                                    |                 |
|------------------------------------------------------|-----------------|
| Number of stations                                   | 20              |
| Number of recorded programmes                        | 37,476          |
| Video hours analysed                                 | 23,181.7 h      |
| Female vs. Male percentage for all face appearances  | 27.9% vs. 72.1% |
| Female vs. Male percentage for all voice appearances | 36.6% vs. 63.4% |

| Match Summary            |                       |                            |          |                               |       |
|--------------------------|-----------------------|----------------------------|----------|-------------------------------|-------|
| <input type="radio"/>    | <input type="radio"/> | Appearance time (hh:mm:ss) |          | Number of appearances (prog.) |       |
| <input type="radio"/>    | Reference person      | <input type="radio"/>      | Face     | <input type="radio"/>         | Voice |
|                          | filter data...        |                            |          |                               |       |
| <input type="checkbox"/> | Olaf Scholz           |                            | 19:42:01 | 12:24:21                      | 2229  |
| <input type="checkbox"/> | Robert Habeck         |                            | 10:21:55 | 07:34:42                      | 1274  |
| <input type="checkbox"/> | Christian Lindner     |                            | 07:45:31 | 07:08:20                      | 901   |
| <input type="checkbox"/> | Karl Lauterbach       |                            | 06:06:34 | 06:38:36                      | 546   |
| <input type="checkbox"/> | Stefan Weil           |                            | 04:35:05 | 04:08:11                      | 413   |
| <input type="checkbox"/> | Markus Söder          |                            | 04:31:17 | 04:12:15                      | 469   |
| <input type="checkbox"/> | Annalena Baerbock     |                            | 03:41:00 | 03:57:30                      | 331   |
| <input type="checkbox"/> | Friedrich Merz        |                            | 02:53:58 | 04:11:04                      | 338   |
| <input type="checkbox"/> | Ursula Von der Leyen  |                            | 02:30:58 | 01:55:47                      | 338   |
| <input type="checkbox"/> | Christian Dürr        |                            | 02:22:04 | 03:11:55                      | 204   |

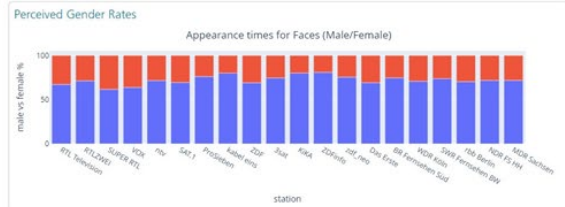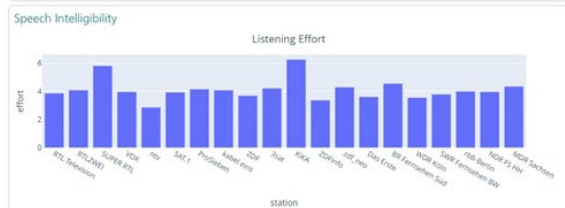

Figure S3: Background and statistics of the Audiovisual Identity Suite



Table S8: Explorative factor analysis for Issue Fatigue

| Faktor                                                                                     | Issue Fatigue | Issue Avoidance | Issue Interest |
|--------------------------------------------------------------------------------------------|---------------|-----------------|----------------|
| <b>“The reporting on climate change...</b>                                                 |               |                 |                |
| ...doesn't reflect my own opinion on the topic at all."                                    | .79           |                 |                |
| ...only aims to influence people."                                                         | .78           |                 |                |
| ...I can't hear or see anything more about the topic."                                     | .76           |                 |                |
| ...annoys me."                                                                             | .78           |                 |                |
| ...is too extensive for me."                                                               | .76           |                 |                |
| ...is too detailed for me."                                                                | .73           |                 |                |
| “I have rather avoided conversations about the topic with other people."                   |               | .78             |                |
| “I have only skimmed articles and posts about the topic in newspapers or on the internet." |               | .75             |                |
| “I have tried to change the subject during conversations about the topic."                 |               | .73             |                |
| “I have avoided the topic as much as possible."                                            |               | .71             |                |
| “I have switched channels during TV shows about the topic."                                |               | .67             |                |
| “I have searched for information about the topic."                                         |               |                 | .86            |
| „I follow it attentively."                                                                 |               |                 | .74            |
| “I have watched special programs on TV."                                                   |               |                 | .86            |
| <b>Mean (SD) <sup>2)</sup></b>                                                             | 2.6 (0.3)     | 3.2 (0.2)       | 3.1 (1.1)      |
| <b>Eigenwert</b>                                                                           | 6.9           | 2.7             | 1.0            |
| <b>Cronbachs-<math>\alpha</math></b>                                                       | .94           | .86             | .80            |

Notes: Principal component analysis, Varimax with Kaiser normalization; 68.59% total explained variance; all factor loadings > 0.3; KMO coefficient of .91; scale mean on a 5-point Likert scale from 1 'strongly disagree' to 5 'strongly agree'. n = 1,450. Excluded due to double loadings are the two items '...I consider it to be correct.' and 'I find it credible.'

## Questionnaire on climate change and biodiversity on TV (in German)

### S1 Welchem Geschlecht ordnen Sie sich zu?

Single choice

| Männlich                 | weiblich                 | nicht-binär/<br>genderqueer | Kein<br>Geschlecht       | keine<br>Angabe          | Eigene<br>Angabe     |
|--------------------------|--------------------------|-----------------------------|--------------------------|--------------------------|----------------------|
| <input type="checkbox"/> | <input type="checkbox"/> | <input type="checkbox"/>    | <input type="checkbox"/> | <input type="checkbox"/> | <input type="text"/> |

### S2 In welchem Bundesland wohnen Sie?

Single choice

|                          |                        |
|--------------------------|------------------------|
| <input type="checkbox"/> | Baden-Württemberg      |
| <input type="checkbox"/> | Bayern                 |
| <input type="checkbox"/> | Berlin                 |
| <input type="checkbox"/> | Brandenburg            |
| <input type="checkbox"/> | Bremen                 |
| <input type="checkbox"/> | Hamburg                |
| <input type="checkbox"/> | Hessen                 |
| <input type="checkbox"/> | Mecklenburg-Vorpommern |
| <input type="checkbox"/> | Niedersachsen          |
| <input type="checkbox"/> | Nordrhein-Westfalen    |
| <input type="checkbox"/> | Rheinland-Pfalz        |
| <input type="checkbox"/> | Saarland               |
| <input type="checkbox"/> | Sachsen                |
| <input type="checkbox"/> | Sachsen-Anhalt         |
| <input type="checkbox"/> | Schleswig-Holstein     |
| <input type="checkbox"/> | Thüringen              |

**S3 Was ist ihr höchster Bildungsabschluss? Wenn Sie sich zur Zeit Vollzeit in Ausbildung/Studium befinden, nennen Sie bitte Ihre höchste abgeschlossene Qualifikation zur Zeit.**

Single  
choice

- ☐ Noch kein Schulabschluss/noch Schüler
- ☐ Hauptschulabschluss
- ☐ Weiterführende Schule ohne Abitur (z. B. mittlere Reife)
- ☐ Abitur
- ☐ Studienabschluss

**S4 Wie alt sind Sie?**

**Numeric, only 2 digits possible**

**Screen out  $\leq 14$  or  $\geq 70$**

### **Eisbrecherfrage zur Themenwichtigkeit**

**Zu Beginn unserer Umfrage möchten wir von Ihnen wissen:**

**Was ist Ihrer Meinung nach gegenwärtig das wichtigste Problem in Deutschland?**

*Bitte kreuzen Sie nicht mehr als ein Problem an.*

[Rotate items, single choice]

- |                                   |                          |
|-----------------------------------|--------------------------|
| Coronavirus                       | <input type="checkbox"/> |
| Energie/Versorgung                | <input type="checkbox"/> |
| Klima                             |                          |
| Ausländer/Integration/Flüchtlinge | <input type="checkbox"/> |
| Bildung                           | <input type="checkbox"/> |
| Renten                            | <input type="checkbox"/> |
| Soziales Gefälle                  | <input type="checkbox"/> |
| Arbeitslosigkeit                  | <input type="checkbox"/> |
| Wirtschaftslage                   | <input type="checkbox"/> |
| Politikverdruss                   | <input type="checkbox"/> |
| Gesundheitswesen, Pflege          | <input type="checkbox"/> |
| Kosten/Löhne/Preise               | <input type="checkbox"/> |
| Mieten/Wohnungsmarkt              | <input type="checkbox"/> |
| Ukraine/Krieg/Russland            | <input type="checkbox"/> |

## Und was ist ein weiteres wichtiges Problem?

Bitte kreuzen Sie nicht mehr als ein Problem an.

[Rotate items, single choice]

- |                                   |                          |
|-----------------------------------|--------------------------|
| Coronavirus                       | <input type="checkbox"/> |
| Energie/Versorgung                | <input type="checkbox"/> |
| Klima                             | <input type="checkbox"/> |
| Ausländer/Integration/Flüchtlinge | <input type="checkbox"/> |
| Bildung                           | <input type="checkbox"/> |
| Renten                            | <input type="checkbox"/> |
| Soziales Gefälle                  | <input type="checkbox"/> |
| Arbeitslosigkeit                  | <input type="checkbox"/> |
| Wirtschaftslage                   | <input type="checkbox"/> |
| Politikverdruss                   | <input type="checkbox"/> |
| Gesundheitswesen, Pflege          | <input type="checkbox"/> |
| Kosten/Löhne/Preise               | <input type="checkbox"/> |
| Mieten/Wohnungsmarkt              | <input type="checkbox"/> |
| Ukraine/Krieg/Russland            | <input type="checkbox"/> |

## Wahrnehmung Extremwetter-Ereignisse

In diesem Sommer gab es eine Reihe von Extremwetter-Ereignissen in Deutschland, insbesondere Hitzewellen sowie eine Dürre. **Haben diese Ereignisse Ihre Wahrnehmung vom Klimawandel verändert?**

|                                                                                                                                  | stimme<br>überhaupt<br>nicht zu<br>1 | Stimme<br>eher<br>nicht zu<br>2 | Teils<br>teils<br>3      | Stimme<br>eher zu<br>4   | stimme voll<br>und ganz zu<br>5 | keine<br>Angabe          |
|----------------------------------------------------------------------------------------------------------------------------------|--------------------------------------|---------------------------------|--------------------------|--------------------------|---------------------------------|--------------------------|
| „Die Extremwetter-Ereignisse<br>in diesem Sommer<br>(Hitze, Dürre,...) haben meine<br>Wahrnehmung vom<br>Klimawandel verändert.“ | <input type="checkbox"/>             | <input type="checkbox"/>        | <input type="checkbox"/> | <input type="checkbox"/> | <input type="checkbox"/>        | <input type="checkbox"/> |

**Und inwiefern hat sich ihre Wahrnehmung verändert?**

**Bitte beschreiben Sie dies in einigen Stichworten.**

\_\_\_\_\_ (Maximale Zeichenzahl festlegen)

⇒ **Keine Pflichtangabe**

Die Medien haben über diese Extremwetter-Ereignisse berichtet. **Hat diese Berichterstattung Ihre Wahrnehmung vom Klimawandel verändert?**

|                                                                                                                                               | stimme<br>überhaupt<br>nicht zu<br>1 | Stimme<br>eher<br>nicht zu<br>2 | Teils<br>teils<br>3      | Stimme<br>eher zu<br>4   | stimme voll<br>und ganz zu<br>5 | keine<br>Angabe          |
|-----------------------------------------------------------------------------------------------------------------------------------------------|--------------------------------------|---------------------------------|--------------------------|--------------------------|---------------------------------|--------------------------|
| „Die Berichterstattung über die Extremwetter-Ereignisse in diesem Sommer (Hitze, Dürre,...) hat meine Wahrnehmung vom Klimawandel verändert.“ | <input type="checkbox"/>             | <input type="checkbox"/>        | <input type="checkbox"/> | <input type="checkbox"/> | <input type="checkbox"/>        | <input type="checkbox"/> |

Und inwiefern hat sich Ihre Wahrnehmung durch die Berichterstattung verändert?  
**Bitte beschreiben Sie dies in einigen Stichworten.**

**Keine Pflichtangabe**

\_\_\_\_\_ (Maximale Zeichenzahl festlegen)

Bitte denken Sie an diese Berichte, besonders an Fernsehberichte, die Sie persönlich im letzten Sommer gesehen und gehört haben.

[Rotate items]

|                                                                                                             | stimme<br>überhaupt<br>nicht zu<br>1 | Stimme<br>eher<br>nicht zu<br>2 | Teils<br>teils<br>3      | Stimme<br>eher zu<br>4   | stimme voll<br>und ganz zu<br>5 | keine<br>Angabe          |
|-------------------------------------------------------------------------------------------------------------|--------------------------------------|---------------------------------|--------------------------|--------------------------|---------------------------------|--------------------------|
| „Die Berichterstattung über Extremwetter-Ereignisse in diesem Sommer hat mir deutlich gemacht...            |                                      |                                 |                          |                          |                                 |                          |
| ...dass der Klimawandel schon jetzt passiert.“                                                              | <input type="checkbox"/>             | <input type="checkbox"/>        | <input type="checkbox"/> | <input type="checkbox"/> | <input type="checkbox"/>        | <input type="checkbox"/> |
| ...dass der Klimawandel auch mich betrifft.“                                                                | <input type="checkbox"/>             | <input type="checkbox"/>        | <input type="checkbox"/> | <input type="checkbox"/> | <input type="checkbox"/>        | <input type="checkbox"/> |
| ...dass der Klimawandel auch hier in Deutschland passiert.“                                                 | <input type="checkbox"/>             | <input type="checkbox"/>        | <input type="checkbox"/> | <input type="checkbox"/> | <input type="checkbox"/>        | <input type="checkbox"/> |
| ...der Klimawandel schon in den nächsten Jahren zu schlimmen Folgen führen wird.“                           | <input type="checkbox"/>             | <input type="checkbox"/>        | <input type="checkbox"/> | <input type="checkbox"/> | <input type="checkbox"/>        | <input type="checkbox"/> |
| ...dass der Klimawandel auch mein soziales Umfeld betrifft (Familie, Freunde, Kolleginnen/Kollegen, etc.).“ | <input type="checkbox"/>             | <input type="checkbox"/>        | <input type="checkbox"/> | <input type="checkbox"/> | <input type="checkbox"/>        | <input type="checkbox"/> |

...dass der Klimawandel auch an meinem Wohnort passiert.“ ☐ ☐ ☐ ☐ ☐ ☐

...dass Extremwetter-Ereignissen deutlich häufiger und intensiver als bisher stattfinden werden.“ ☐ ☐ ☐ ☐ ☐ ☐

...dass es wahrscheinlicher wird, dass Extremwetter-Ereignisse passieren.“ ☐ ☐ ☐ ☐ ☐ ☐

## Mediennutzung

Nun geht es darum, welche Medien Sie nutzen.

**Bitte sagen Sie, wie häufig Sie...**

|                                                                                    | Täglich oder<br>fast täglich | 2-3 mal in<br>der Woche  | Ungefähr einmal in<br>der Woche | Seltener                 | Informationsquelle<br>ist nicht verfügbar | Weiß nicht               |
|------------------------------------------------------------------------------------|------------------------------|--------------------------|---------------------------------|--------------------------|-------------------------------------------|--------------------------|
| <b>Fernsehen sehen<br/>(Fernsehgerät,<br/>Streaming,<br/>Mediatheken<br/>o.ä.)</b> | <input type="checkbox"/>     | <input type="checkbox"/> | <input type="checkbox"/>        | <input type="checkbox"/> | <input type="checkbox"/>                  | <input type="checkbox"/> |
| <b>...das Internet<br/>nutzen</b>                                                  | <input type="checkbox"/>     | <input type="checkbox"/> | <input type="checkbox"/>        | <input type="checkbox"/> | <input type="checkbox"/>                  | <input type="checkbox"/> |
| <b>...soziale<br/>Netzwerke im<br/>Internet nutzen</b>                             | <input type="checkbox"/>     | <input type="checkbox"/> | <input type="checkbox"/>        | <input type="checkbox"/> | <input type="checkbox"/>                  | <input type="checkbox"/> |
| <b>...Radio hören</b>                                                              | <input type="checkbox"/>     | <input type="checkbox"/> | <input type="checkbox"/>        | <input type="checkbox"/> | <input type="checkbox"/>                  | <input type="checkbox"/> |
| <b>...gedruckte<br/>Presseerzeugnis<br/>se lesen</b>                               | <input type="checkbox"/>     | <input type="checkbox"/> | <input type="checkbox"/>        | <input type="checkbox"/> | <input type="checkbox"/>                  | <input type="checkbox"/> |

Wenn Sie einmal an die Tage denken, an denen Sie fernsehen: **Wie lange - in Stunden (HH) und Minuten (MM) - sehen Sie da im Durchschnitt fern (inkl. Online-Mediatheken, Streaming etc.)?**

**Open text field, in this format field, in this format HH:MM and ,keine Angabe‘ exclusive**

HH:MM

☐ Keine Angabe

**Nun geht es darum, wie häufig sie Nachrichten nutzen.** Mit Nachrichten sind nationale, internationale, regionale/lokale Nachrichten und sonstige aktuelle Informationen gemeint.  
**Wie häufig konsumieren Sie üblicherweise Nachrichten?**

**single choice**

| Mehr als 10<br>mal täglich | Zwischen 2-<br>5 mal<br>täglich | 1 mal<br>täglich         | An 4-6 Tagen<br>pro Woche | An 2-3<br>Tagen pro<br>Woche | 1 Mal<br>pro<br>Woche    | Seltener als 1<br>Mal pro<br>Woche | Seltener als 1<br>Mal pro<br>Monat | Wei<br>ß<br>nicht        |
|----------------------------|---------------------------------|--------------------------|---------------------------|------------------------------|--------------------------|------------------------------------|------------------------------------|--------------------------|
| <input type="checkbox"/>   | <input type="checkbox"/>        | <input type="checkbox"/> | <input type="checkbox"/>  | <input type="checkbox"/>     | <input type="checkbox"/> | <input type="checkbox"/>           | <input type="checkbox"/>           | <input type="checkbox"/> |

**Wie häufig nutzen Sie die folgenden Fernsehsendungen?**

|                                                                                                                                                     | Häufig                   | Manchmal                 | Selten                   | Nie                      | Wei ß nicht              |
|-----------------------------------------------------------------------------------------------------------------------------------------------------|--------------------------|--------------------------|--------------------------|--------------------------|--------------------------|
| <b>Politische Talkshows</b><br>(z. B. Anne Will, Hart<br>aber fair ...)                                                                             | <input type="checkbox"/> |
| <b>Politische<br/>Magazin-Sendungen</b><br>(z.B. Spiegel-TV,<br>Stern-TV, Monitor,<br>Kontraste)                                                    | <input type="checkbox"/> |
| <b>Serien</b><br>(mit aktuellem Bezug)                                                                                                              | <input type="checkbox"/> |
| <b>Dokumentationen/Doku-<br/>serien</b><br>(z.B. Plan B, Planet e,<br>Welt der Wunder, SAT<br>1 Reportage, Pro7<br>Thema,...)                       | <input type="checkbox"/> |
| <b>Nachrichten<br/>und<br/>Nachrichtenmagazin<br/>der<br/>öffentlich-rechtlichen<br/>Sender</b><br>(z. B. ZDF Heute,<br>Tagesschau,<br>Tagesthemen) | <input type="checkbox"/> |
| <b>Spielfilme</b><br>(Tatort, ZDF-<br>Sonntagsfilm,<br>Actionfilme, Drama,...)                                                                      | <input type="checkbox"/> |
| <b>Nachrichten und<br/>Nachrichtenmagazine<br/>der privaten Sender</b><br>(z. B. RTL Aktuell,<br>Pro7 Newstime)                                     | <input type="checkbox"/> |

|                                                                                                      |                          |                          |                          |                          |                          |                          |
|------------------------------------------------------------------------------------------------------|--------------------------|--------------------------|--------------------------|--------------------------|--------------------------|--------------------------|
| <b>Wissenschafts-<br/>sendungen</b><br>(z.B. Quarks, Galileo,<br>TerraX,...)                         | <input type="checkbox"/> |
| <b>Beiträge im<br/>Lokalfernsehen</b><br>(z.B. MDR; BR, NDR)                                         | <input type="checkbox"/> |
| <b>Spiel- und Quizshows</b><br>(z.B. Wer wird<br>Millionär, Das Quiz mit<br>Jörg Pilawa)             | <input type="checkbox"/> |
| <b>Reality-und<br/>Gerichtsshow</b><br>(z.B. Richterin Barbara<br>Salesch, Lenßen &<br>Partner,... ) | <input type="checkbox"/> |
| <b>Casting-und Talent-<br/>Shows</b> (z.B. Höhle der<br>Löwen, DSDS, The<br>Voice of Germany,...)    | <input type="checkbox"/> |
| <b>Satire und LateNight-<br/>Shows</b> (z.B. Extra3,<br>Neo Magazin Royal,...)                       | <input type="checkbox"/> |

Wenn es um den Klimawandel geht: **Welcher der folgenden Medien nutzen Sie am Häufigsten?**

[Rotate items, single choice]

|                                                                     |                          |
|---------------------------------------------------------------------|--------------------------|
| <b>Fernsehen</b>                                                    | <input type="checkbox"/> |
| <b>Online-Nachrichtenseiten</b> von großen<br>Nachrichten Anbietern | <input type="checkbox"/> |
| <b>Spezialisierte Formate</b> zum Thema<br>Klimawandel              | <input type="checkbox"/> |
| Alternative Quellen wie <b>soziale Medien oder Blogs</b>            | <input type="checkbox"/> |
| <b>Unterhaltungen</b> mit Kollegen, Freunden,<br>Familie            | <input type="checkbox"/> |
| <b>Gedruckte Zeitungen</b>                                          | <input type="checkbox"/> |
| <b>Radio</b>                                                        | <input type="checkbox"/> |



Ich weiß nicht ☐

Ich schenke dem Thema keine Aufmerksamkeit ☐

## Einstellung zum Klimawandel

**Vielleicht haben Sie in letzter Zeit bemerkt, dass das Thema Klimawandel mehr Beachtung in den Nachrichten gefunden hat. Mit Klimawandel ist**

gemeint, dass die globale Durchschnittstemperatur in den vergangenen 150 Jahren angestiegen ist, dass sie in Zukunft noch weiter ansteigen wird, und dass sich im Ergebnis das globale Klima erwärmen wird.

**Was denken Sie? Denken Sie, dass es einen Klimawandel gibt?**

**Single choice**

1 Sehr sicher, dass es den Klimawandel nicht gibt ☐

2 Ziemlich sicher, dass es den Klimawandel nicht gibt ☐

3 Recht sicher, dass es den Klimawandel nicht gibt ☐

4 Nicht sicher, ob globale Erwärmung nicht stattfindet ☐

5 Weiss nicht ☐

6 Nicht ganz sicher, dass der Klimawandel stattfindet ☐

7 Ziemlich sicher, dass der Klimawandel stattfindet ☐

8 Sehr sicher, dass der Klimawandel stattfindet ☐

9 Extrem sicher, dass der Klimawandel stattfindet ☐

**Vorausgesetzt der Klimawandel findet statt – was denken Sie, sind die Gründe.**

**Multi response, code4 exclusive**

1 Vor allem vom Menschen verursacht ☐

2 Vor allem von natürlichen Schwankungen verursacht ☐

3 Andere Gründe ☐

4 Keiner der genannten Gründe, weil es den Klimawandel nicht gibt ☐

Was denken Sie, wie sehr wird der Klimawandel Sie persönlich betreffen?

**Single choice**

|                |                          |
|----------------|--------------------------|
| Weiß nicht (0) | <input type="checkbox"/> |
| Gar nicht (1)  | <input type="checkbox"/> |
| Nur wenig (2)  | <input type="checkbox"/> |
| Etwas (3)      | <input type="checkbox"/> |
| Sehr stark (4) | <input type="checkbox"/> |

Was denken Sie, wie sehr wird der Klimawandel zukünftige Generationen betreffen?

**Single choice**

|                |                          |
|----------------|--------------------------|
| Weiß nicht (0) | <input type="checkbox"/> |
| Gar nicht (1)  | <input type="checkbox"/> |
| Nur wenig (2)  | <input type="checkbox"/> |
| Etwas (3)      | <input type="checkbox"/> |
| Sehr stark (4) | <input type="checkbox"/> |

Was denken Sie, wann wird Klimawandel die Menschen in Deutschland betreffen?

**Single choice**

|                 |                          |
|-----------------|--------------------------|
| Niemals (1)     | <input type="checkbox"/> |
| 100 Jahre (2)   | <input type="checkbox"/> |
| 50 Jahre (3)    | <input type="checkbox"/> |
| 25 Jahre (4)    | <input type="checkbox"/> |
| 10 Jahre (5)    | <input type="checkbox"/> |
| Schon Jetzt (6) | <input type="checkbox"/> |

**Welche der folgenden Aussagen kommen Ihren Ansichten am nächsten?**

**Single choice**

|                                                                                                                                           |                          |
|-------------------------------------------------------------------------------------------------------------------------------------------|--------------------------|
| 1 Es gibt keinen Klimawandel                                                                                                              | <input type="checkbox"/> |
| 2 Menschen können den Klimawandel nicht beeinflussen, auch wenn er passiert                                                               | <input type="checkbox"/> |
| 3 Die Menschen können den Klimawandel aufhalten, aber sind nicht bereit dazu, ihr Verhalten zu verändern, also wird dies nicht passieren. | <input type="checkbox"/> |
| 4 Die Menschen können den Klimawandel aufhalten, aber es ist momentan unklar, ob sie das tun werden, was dazu nötig ist.                  | <input type="checkbox"/> |
| 5 Die Menschen können den Klimawandel aufhalten, und sie werden das erfolgreich tun.                                                      | <input type="checkbox"/> |

**Wie besorgt sind Sie wegen des Klimawandels?**

**Single choice**

|                      |                          |
|----------------------|--------------------------|
| 4 Sehr besorgt       | <input type="checkbox"/> |
| 3 Etwas besorgt      | <input type="checkbox"/> |
| 2 Nicht sehr besorgt | <input type="checkbox"/> |
| 1 Nicht besorgt      | <input type="checkbox"/> |

**Mit welchen Gefühlen verbinden Sie persönlich den Klimawandel?**

**Multi response, code 9 exclusive**

|                     |                          |
|---------------------|--------------------------|
| 1 Traurigkeit       | <input type="checkbox"/> |
| 2. Angst            | <input type="checkbox"/> |
| 3. Besorgtheit      | <input type="checkbox"/> |
| 4. Wut              | <input type="checkbox"/> |
| 5. Ohnmacht         | <input type="checkbox"/> |
| 6. Schuld           | <input type="checkbox"/> |
| 7. Optimismus       | <input type="checkbox"/> |
| 8. Gleichgültigkeit | <input type="checkbox"/> |
| 9 keine Angabe      | <input type="checkbox"/> |

**Wie viel haben Sie bisher über den Klimawandel nachgedacht?**

**Single choice**

|              |                          |
|--------------|--------------------------|
| 1 Gar nicht  | <input type="checkbox"/> |
| 2 Sehr wenig | <input type="checkbox"/> |
| 3 Etwas      | <input type="checkbox"/> |
| 4 Sehr viel  | <input type="checkbox"/> |

**Wie wichtig ist das Thema Klimawandel für Sie persönlich?"**

**Single choice**

|                     |                          |
|---------------------|--------------------------|
| 1 Gar nicht wichtig | <input type="checkbox"/> |
| 2 Kaum wichtig      | <input type="checkbox"/> |
| 3 Etwas wichtig     | <input type="checkbox"/> |
| 4 Sehr wichtig      | <input type="checkbox"/> |
| 5 Extrem wichtig    | <input type="checkbox"/> |

**Wie weit stimmen Sie mit der folgenden Aussage überein:**

**„Ich könnte meine Meinung zum Klimawandel leicht ändern.“**

**Single choice**

|                        |                          |
|------------------------|--------------------------|
| 4 Stimme gar nicht zu  | <input type="checkbox"/> |
| 3 Stimme eher nicht zu | <input type="checkbox"/> |
| 2 Stimme etwas zu      | <input type="checkbox"/> |
| 1 Stimme sehr zu       | <input type="checkbox"/> |

**Wie viele Ihrer Bekannten (Freunde und Freundinnen) teilen Ihre Meinung über den Klimawandel?**

**Single choice**

|                 |                          |
|-----------------|--------------------------|
| 1 Niemand       | <input type="checkbox"/> |
| 2 Einige wenige | <input type="checkbox"/> |
| 3 Mehrere       | <input type="checkbox"/> |
| 4 Die meisten   | <input type="checkbox"/> |
| 5 Alle          | <input type="checkbox"/> |

**Wie oft in den vergangenen 12 Monaten haben Sie Firmen, die sich dem Klimaschutz verweigern, „bestraft“ (boykottiert), indem sie deren Produkte nicht gekauft haben?**

**Single choice**

|                    |                          |
|--------------------|--------------------------|
| 0 Weiß nicht       | <input type="checkbox"/> |
| 1 Nie              | <input type="checkbox"/> |
| 2 Ein einziges Mal | <input type="checkbox"/> |
| 3 Einige Male      | <input type="checkbox"/> |
| 4 Häufig (4-5)     | <input type="checkbox"/> |
| 5 Sehr häufig (6+) | <input type="checkbox"/> |

**Welche Priorität sollte das Thema globale Erwärmung bei der nächsten Bundestagswahl haben?**

**Single choice**

|             |                          |
|-------------|--------------------------|
| 1 Niedrig   | <input type="checkbox"/> |
| 2 Mittel    | <input type="checkbox"/> |
| 3 Hoch      | <input type="checkbox"/> |
| 4 Sehr hoch | <input type="checkbox"/> |

**Was meinen Sie, sollten Bürgerinnen und Bürger selbst mehr oder weniger zum Klimaschutz tun**

**Single choice**

|                                      |                          |
|--------------------------------------|--------------------------|
| 1 sehr viel weniger                  | <input type="checkbox"/> |
| 2 Weniger                            | <input type="checkbox"/> |
| 3 Sie tun aktuell genau richtig viel | <input type="checkbox"/> |
| 4 Mehr                               | <input type="checkbox"/> |
| 5 Sehr viel mehr                     | <input type="checkbox"/> |

## Was meinen Sie: Sollte Deutschland CO<sub>2</sub>-Emissionen reduzieren...

### Single choice

|                                                                                                                                       |                          |
|---------------------------------------------------------------------------------------------------------------------------------------|--------------------------|
| 0 Weiß nicht                                                                                                                          | <input type="checkbox"/> |
| 1 Deutschland sollte seine Emissionen nicht reduzieren                                                                                | <input type="checkbox"/> |
| 2 Nur wenn andere Industrieländer <u>und</u> die Entwicklungsländer (wie China, Indien, Brasilien) ihre Emissionen ebenso reduzieren. | <input type="checkbox"/> |
| 3 Nur wenn andere Industrieländer (wie England, USA, Japan) auch ihre Emissionen reduzieren                                           | <input type="checkbox"/> |
| 4 Unabhängig davon, was andere Länder tun                                                                                             | <input type="checkbox"/> |

## Biodiversität

Auch das Thema Biodiversität (Artenvielfalt) hat mehr Beachtung in den Nachrichten gefunden. Mit Biodiversität ist die Vielfalt aller lebenden Organismen, Lebensräume und Ökosysteme gemeint. **Mit dem Begriff „Artensterben“ ist gemeint, dass mehr Arten aussterben, als es im natürlichen Verlauf der Evolution üblich wäre.**

**Was denken Sie? Denken Sie, dass es ein Artensterben gibt, das über das Normalmaß hinausgeht?**

### Single choice

|                                                        |                          |
|--------------------------------------------------------|--------------------------|
| 1 Sehr sicher, dass es ein Artensterben nicht gibt     | <input type="checkbox"/> |
| 2 Ziemlich sicher, dass es ein Artensterben nicht gibt | <input type="checkbox"/> |
| 3 Recht sicher, dass es ein Artensterben nicht gibt    | <input type="checkbox"/> |
| 4 Nicht sicher, ob ein Artensterben stattfindet        | <input type="checkbox"/> |
| 5 Weiss nicht                                          | <input type="checkbox"/> |
| 6 Nicht ganz sicher, dass ein Artensterben stattfindet | <input type="checkbox"/> |
| 7 Ziemlich sicher, dass ein Artensterben stattfindet   | <input type="checkbox"/> |
| 8 Sehr sicher, dass ein Artensterben stattfindet       | <input type="checkbox"/> |
| 9 Extrem sicher, dass ein Artensterben stattfindet     | <input type="checkbox"/> |

**Vorausgesetzt das Artensterben findet statt – was denken Sie, sind die Gründe.**  
**Single choice**

|                                                                    |                          |
|--------------------------------------------------------------------|--------------------------|
| 1 Vor allem vom Menschen verursacht                                | <input type="checkbox"/> |
| 2 Vor allem von natürlichen Schwankungen der Evolution verursacht  | <input type="checkbox"/> |
| 3 Andere Gründe                                                    | <input type="checkbox"/> |
| 4 Keiner der genannten Gründe, weil es das Artensterben nicht gibt | <input type="checkbox"/> |

**Wie wichtig ist das Thema Artensterben für Sie persönlich?”**  
**Single choice**

|                     |                          |
|---------------------|--------------------------|
| 1 Gar nicht wichtig | <input type="checkbox"/> |
| 2 Kaum wichtig      | <input type="checkbox"/> |
| 3 Etwas wichtig     | <input type="checkbox"/> |
| 4 Sehr wichtig      | <input type="checkbox"/> |
| 5 Extrem wichtig    | <input type="checkbox"/> |

### **Themenpräsenz in der Medienberichterstattung**

Nun geht es uns darum, wie stark bestimmte Themen in den von Ihnen genutzten Medien präsent sind, d.h. als Thema vorkommen, wenn Sie an die letzten Monate denken.

**Wie präsent ist das Thema Klimawandel in den von Ihnen genutzten Medien?”**

**Single choice**

|                     |                          |
|---------------------|--------------------------|
| 1 Gar nicht präsent | <input type="checkbox"/> |
| 2 Kaum präsent      | <input type="checkbox"/> |
| 3 Etwas präsent     | <input type="checkbox"/> |
| 4 Sehr präsent      | <input type="checkbox"/> |
| 5 Extrem präsent    | <input type="checkbox"/> |

Und wie ist das mit dem Thema Artensterben:

**Wie präsent ist das Thema Artensterben in den von Ihnen genutzten Medien?"**

**Single choice**

|                     |                          |
|---------------------|--------------------------|
| 1 Gar nicht präsent | <input type="checkbox"/> |
| 2 Kaum präsent      | <input type="checkbox"/> |
| 3 Etwas präsent     | <input type="checkbox"/> |
| 4 Sehr präsent      | <input type="checkbox"/> |
| 5 Extrem präsent    | <input type="checkbox"/> |

**Und wie präsent war das Thema Extremwetter-Ereignisse in den von Ihnen genutzten Medien, insbesondere im vergangenen Sommer?"**

**Single choice**

|                     |                          |
|---------------------|--------------------------|
| 1 Gar nicht präsent | <input type="checkbox"/> |
| 2 Kaum präsent      | <input type="checkbox"/> |
| 3 Etwas präsent     | <input type="checkbox"/> |
| 4 Sehr präsent      | <input type="checkbox"/> |
| 5 Extrem präsent    | <input type="checkbox"/> |

**Themenverdrossenheit und -vermeidung**

**Die Menschen reagieren sehr unterschiedlich auf das Thema Klimawandel.**

**Wie ist das bei Ihnen?**

**[Rotate items]**

|                                                       | stimme<br>überhaupt<br>nicht zu<br>1 | Stimme<br>eher<br>nicht zu<br>2 | Teils<br>teils<br>3      | Stimme<br>eher zu<br>4   | stimme voll<br>und ganz zu<br>5 | keine<br>Angabe          |
|-------------------------------------------------------|--------------------------------------|---------------------------------|--------------------------|--------------------------|---------------------------------|--------------------------|
| <b>„Die Berichterstattung über den Klimawandel...</b> |                                      |                                 |                          |                          |                                 |                          |
| ...verfolge ich aufmerksam.“                          | <input type="checkbox"/>             | <input type="checkbox"/>        | <input type="checkbox"/> | <input type="checkbox"/> | <input type="checkbox"/>        | <input type="checkbox"/> |
| ... ist mir zu detailliert.“                          | <input type="checkbox"/>             | <input type="checkbox"/>        | <input type="checkbox"/> | <input type="checkbox"/> | <input type="checkbox"/>        | <input type="checkbox"/> |
| ... ist mir zu umfangreich.“                          | <input type="checkbox"/>             | <input type="checkbox"/>        | <input type="checkbox"/> | <input type="checkbox"/> | <input type="checkbox"/>        | <input type="checkbox"/> |
| ... empfinde ich als glaubwürdig.“                    | <input type="checkbox"/>             | <input type="checkbox"/>        | <input type="checkbox"/> | <input type="checkbox"/> | <input type="checkbox"/>        | <input type="checkbox"/> |
| ... halte ich für korrekt.“                           | <input type="checkbox"/>             | <input type="checkbox"/>        | <input type="checkbox"/> | <input type="checkbox"/> | <input type="checkbox"/>        | <input type="checkbox"/> |



|                                                                 |                          |                          |                          |                          |                          |                          |
|-----------------------------------------------------------------|--------------------------|--------------------------|--------------------------|--------------------------|--------------------------|--------------------------|
| ... hat nur das Ziel, die Leute zu beeinflussen.“               | <input type="checkbox"/> |
| ...nervt mich.“                                                 | <input type="checkbox"/> |
| ...gibt meine eigene Meinung zum Thema überhaupt nicht wieder.“ | <input type="checkbox"/> |
| ... von dem Thema kann ich nichts mehr hören und sehen“         | <input type="checkbox"/> |

**Bitte kreuzen Sie jeweils an, wie häufig Sie die nachfolgenden Dinge in den vergangenen Monaten gemacht haben:**

[Rotate items]

|                                                                             | nie<br>1                 | selten<br>2              | teilweis<br>e<br>3       | häufig<br>4              | sehr häufig<br>5         | keine<br>Angabe          |
|-----------------------------------------------------------------------------|--------------------------|--------------------------|--------------------------|--------------------------|--------------------------|--------------------------|
|                                                                             | <input type="checkbox"/> |
| Nach Informationen zum Thema gesucht                                        | <input type="checkbox"/> |
| Gespräche zum Thema mit anderen Menschen eher vermieden                     | <input type="checkbox"/> |
| Dem Thema so gut wie es geht aus dem Weg gegangen                           | <input type="checkbox"/> |
| Mir im Fernsehen spezielle Sendungen dazu angeschaut                        | <input type="checkbox"/> |
| Artikel und Beiträge zum Thema in Zeitungen oder im Internet nur überflogen | <input type="checkbox"/> |
| Bei TV-Sendungen umgeschaltet                                               | <input type="checkbox"/> |
| Bei Gesprächen über das Thema versucht, das Thema zu wechseln               | <input type="checkbox"/> |

## Lösungsorientierter Journalismus

In den folgenden Fragen geht es uns jetzt darum zu verstehen, wie Sie persönlich die Berichterstattung zum Klimawandel erlebt haben. Denken Sie bitte an die letzten Monate, sowie die Medien, die Sie auch wirklich persönlich genutzt haben.

**Wie haben Sie persönlich die Berichterstattung zum Klimawandel erlebt?**

|                                                                                 | sehr                     | etwas                    | Teils<br>teils           | etwas                    | sehr                     |                                                                                     |
|---------------------------------------------------------------------------------|--------------------------|--------------------------|--------------------------|--------------------------|--------------------------|-------------------------------------------------------------------------------------|
| Auf <b>Probleme</b> konzentriert                                                | <input type="checkbox"/> | Auf <b>Lösungen</b> konzentriert                                                    |
| Sehr <b>negative</b> Sicht                                                      | <input type="checkbox"/> | Sehr <b>positive</b> Sicht                                                          |
| Die Lösungsvorschläge sind <b>sehr allgemein</b>                                | <input type="checkbox"/> | Die Lösungsvorschläge sind <b>sehr konkret</b>                                      |
| Lenkt den Blick auf die <b>Vergangenheit</b>                                    | <input type="checkbox"/> | Lenkt den Blick auf die <b>Zukunft</b>                                              |
| <b>Lässt offen</b> , was die nächsten Schritte zu mehr Klimaschutz sein müssten | <input type="checkbox"/> | <b>Macht konkret</b> , was die nächsten Schritte zu mehr Klimaschutz sein müssten.  |
| Lässt mich <b>pessimistisch</b> in die Zukunft schauen                          | <input type="checkbox"/> | Lässt mich <b>optimistisch</b> in die Zukunft schauen                               |
| Wiederholt die <b>schon bekannten</b> Lösungen zum Klimaschutz                  | <input type="checkbox"/> | Zeigt <b>neue und kreative</b> Lösungen zum Klimaschutz                             |
| Zeigt <b>schon bekannte, prominente</b> Gesichter/Personen                      | <input type="checkbox"/> | Zeigt <b>neue, weniger prominente</b> Gesichter/Personen                            |
| Macht mir deutlich, wie <b>ausweglos</b> die Situation ist                      | <input type="checkbox"/> | Stimmt mich <b>zuversichtlich</b> , dass die Situation gelöst werden kann           |
| <b>Entmutigt mich</b> , persönlich etwas zum Klimaschutz zu tun                 | <input type="checkbox"/> | <b>Ermutigt mich</b> , persönlich mehr als bisher zum Klimaschutz zu tun            |
| Setzt die falschen <b>inhaltlichen Schwerpunkte</b>                             | <input type="checkbox"/> | Setzt die richtigen <b>inhaltlichen Schwerpunkte</b>                                |
| Lässt mich <b>nichts Neues</b> lernen                                           | <input type="checkbox"/> | Ermöglicht mir oft einen <b>echten Lerneffekt</b>                                   |
| Lässt mich ratlos, wie <b>umfangreicherer</b> Klimaschutz gelingen könnte       | <input type="checkbox"/> | Lässt mich besser verstehen, wie <b>umfangreicherer Klimaschutz</b> gelingen könnte |

|                                                                        |                          |                          |                          |                          |                          |                                                                                 |
|------------------------------------------------------------------------|--------------------------|--------------------------|--------------------------|--------------------------|--------------------------|---------------------------------------------------------------------------------|
| Verliert sich eher in <b>Randaspekten</b> zum Thema Klimaschutz        | <input type="checkbox"/> | Konzentriert sich auf die <b>wirklich wichtigen Fragen</b> zum Klimaschutz      |
| Lässt viele <b>Informationen und Fakten</b> weg, die ich wichtig fände | <input type="checkbox"/> | Vermittelt die <b>Informationen und Fakten</b> , die ich wirklich wichtig finde |
| Nicht <b>sachlich</b> genug                                            | <input type="checkbox"/> | sehr <b>sachlich</b>                                                            |
| nicht <b>emotional</b> berührend                                       | <input type="checkbox"/> | sehr <b>emotional</b> berührend                                                 |

## Wünsche an die Berichterstattung

In den folgenden Fragen geht es darum, was Sie sich für eine zukünftige Berichterstattung zum Thema Klimawandel wünschen. **Wie häufig sollte der Klimawandel im Fernsehen zukünftig Thema sein?**

**Single choice**

|                             |                          |
|-----------------------------|--------------------------|
| 1 Seltener als bisher       | <input type="checkbox"/> |
| 2 Nicht häufiger als bisher | <input type="checkbox"/> |
| 3 Etwas häufiger als bisher | <input type="checkbox"/> |
| 4 Viel häufiger als bisher  | <input type="checkbox"/> |
| 0 keine Angabe              | <input type="checkbox"/> |

Lösungen zum Klimaschutz können ja ganz verschiedene Bereiche im Leben betreffen. Wir würden gerne besser verstehen, was Sie sich für eine zukünftige Berichterstattung wünschen würden. **Bitte kreuzen Sie an, ob Sie den folgenden Aussagen zustimmen oder eher nicht.**

**[Rotate items]**

|                                                                                     | stimme überhaupt nicht zu<br>1 | Stimme eher nicht zu<br>2 | Teils teils<br>3         | Stimme eher zu<br>4      | stimme voll und ganz zu<br>5 | keine Angabe             |
|-------------------------------------------------------------------------------------|--------------------------------|---------------------------|--------------------------|--------------------------|------------------------------|--------------------------|
| „Die Berichterstattung über den Klimawandel sollte in Zukunft deutlicher machen...“ |                                |                           |                          |                          |                              |                          |
| ... wie man als <b>Privatperson</b> mehr zum Klimaschutz beitragen kann.“           | <input type="checkbox"/>       | <input type="checkbox"/>  | <input type="checkbox"/> | <input type="checkbox"/> | <input type="checkbox"/>     | <input type="checkbox"/> |

... wie **Städte, Gemeinden und Kommunen** mehr Klimaschutz  
gelingen kann.

|                          |                          |                          |                          |                          |                          |
|--------------------------|--------------------------|--------------------------|--------------------------|--------------------------|--------------------------|
| <input type="checkbox"/> |
|--------------------------|--------------------------|--------------------------|--------------------------|--------------------------|--------------------------|

... wie in **Deutschland** mehr  
Klimaschutz gelingen kann.“

|                          |                          |                          |                          |                          |                          |
|--------------------------|--------------------------|--------------------------|--------------------------|--------------------------|--------------------------|
| <input type="checkbox"/> |
|--------------------------|--------------------------|--------------------------|--------------------------|--------------------------|--------------------------|

... wie **weltweit** mehr  
Klimaschutz gelingen kann.“

|                          |                          |                          |                          |                          |                          |
|--------------------------|--------------------------|--------------------------|--------------------------|--------------------------|--------------------------|
| <input type="checkbox"/> |
|--------------------------|--------------------------|--------------------------|--------------------------|--------------------------|--------------------------|

...wie **an meinem Wohnort**  
mehr  
Klimaschutz umgesetzt werden  
kann.“

Nun geht es uns darum, welche Menschen in der Berichterstattung zum Klimawandel häufiger zu sehen sein sollten als bisher. **Bitte kreuzen Sie wieder an, ob Sie den folgenden Aussagen zustimmen oder eher nicht.**

[Rotate items]

|                                      |                                 |                     |                        |                                 |                 |
|--------------------------------------|---------------------------------|---------------------|------------------------|---------------------------------|-----------------|
| stimme<br>überhaupt<br>nicht zu<br>1 | Stimme<br>eher<br>nicht zu<br>2 | Teils<br>teils<br>3 | Stimme<br>eher zu<br>4 | stimme voll<br>und ganz zu<br>5 | keine<br>Angabe |
|--------------------------------------|---------------------------------|---------------------|------------------------|---------------------------------|-----------------|

**„Die Berichterstattung über  
den Klimawandel sollte in  
Zukunft häufiger die  
Perspektive von...**

... Wissenschaftlerinnen und  
Wissenschaftlern zeigen.“

|                          |                          |                          |                          |                          |                          |
|--------------------------|--------------------------|--------------------------|--------------------------|--------------------------|--------------------------|
| <input type="checkbox"/> |
|--------------------------|--------------------------|--------------------------|--------------------------|--------------------------|--------------------------|

... der älteren Generation  
zeigen.“

|                          |                          |                          |                          |                          |                          |
|--------------------------|--------------------------|--------------------------|--------------------------|--------------------------|--------------------------|
| <input type="checkbox"/> |
|--------------------------|--------------------------|--------------------------|--------------------------|--------------------------|--------------------------|

... Frauen zeigen.“

|                          |                          |                          |                          |                          |                          |
|--------------------------|--------------------------|--------------------------|--------------------------|--------------------------|--------------------------|
| <input type="checkbox"/> |
|--------------------------|--------------------------|--------------------------|--------------------------|--------------------------|--------------------------|

... Kindern und Jugendlichen  
zeigen.“

|                          |                          |                          |                          |                          |                          |
|--------------------------|--------------------------|--------------------------|--------------------------|--------------------------|--------------------------|
| <input type="checkbox"/> |
|--------------------------|--------------------------|--------------------------|--------------------------|--------------------------|--------------------------|

... von Menschen aus ärmeren  
Ländern zeigen.“

|                          |                          |                          |                          |                          |                          |
|--------------------------|--------------------------|--------------------------|--------------------------|--------------------------|--------------------------|
| <input type="checkbox"/> |
|--------------------------|--------------------------|--------------------------|--------------------------|--------------------------|--------------------------|

... von Menschen mit  
Behinderungen zeigen.“

|                          |                          |                          |                          |                          |                          |
|--------------------------|--------------------------|--------------------------|--------------------------|--------------------------|--------------------------|
| <input type="checkbox"/> |
|--------------------------|--------------------------|--------------------------|--------------------------|--------------------------|--------------------------|

...von Politikerinnen und Politikern.“

☐☐☐☐☐☐

### Open text field, not mandatory

Weitere Vorschläge, und zwar:

---

Wenn Sie sich wünschen dürfen, in welchen Formaten und Sendungen Ihnen in Zukunft der Klimawandel als Thema häufiger begegnet als bisher – wo wäre das dann?

[Rotate items, Mehrfachantwort möglich]

Weiß nicht

**Politische Talkshows**

(z. B. Anne Will, Hart aber fair ...)

☐

**Politische  
Magazin-Sendungen**

(z.B. Spiegel-TV,  
Stern-TV, Monitor,  
Kontraste)

☐

**Serien**

(mit aktuellem Bezug)

☐

**Dokumentationen/Doku-  
dokumentationen  
reihen**

(z.B. Plan B, Planet e,  
Welt der Wunder, SAT  
1 Reportage, Pro7  
Thema,...)

☐

**Nachrichten**

**und  
Nachrichtenmagazing  
der**

**öffentlich-rechtlichen**

☐

**Sender**

(z. B. ZDF Heute,  
Tagesschau,  
Tagesthemen)

**Spielfilme**

(Tatort, ZDF-  
Sonntagsfilm,  
Actionfilme, Drama,...)

☐

**Nachrichten und  
Nachrichtenmagazine  
der privaten Sender**

☐

(z. B. RTL Aktuell,  
Pro7 Newstime)

**Wissenschafts-  
sendungen**

(z.B. Quarks, Galileo, ☐  
TerraX,...)

**Beiträge im**

**Lokalfernsehen** ☐

(z.B: MDR; BR, NDR)

**Spiel- und Quizshows**

(z.B. Wer wird  
Millionär, Das Quiz mit ☐  
Jörg Pilawa)

**Reality-und**

**Gerichtsshow**

(z.B. Richterin Barbara  
Salesch, Lenßen &  
Partner,... )

**Casting-und Talent-**

**Shows** (z.B. Höhle der  
Löwen, DSDS, The  
Voice of Germany,...)

**Satire und LateNight-**

**Shows** (z.B. Extra3, ☐  
Neo Magazin Royal,...)

Jetzt geht es um ein paar weitere Aspekte der Berichterstattung.

**Bitte kreuzen Sie wieder an, welchen Aussagen Sie eher zustimmen und welche Sie ablehnen.**

[Rotate items]

|                                                                                                      | stimme<br>überhaupt<br>nicht zu<br>1 | Stimme<br>eher<br>nicht zu<br>2 | Teils<br>teils<br>3      | Stimme<br>eher zu<br>4   | stimme voll<br>und ganz zu<br>5 | keine<br>Angabe          |
|------------------------------------------------------------------------------------------------------|--------------------------------------|---------------------------------|--------------------------|--------------------------|---------------------------------|--------------------------|
| „Das Thema Klimawandel sollte stärker im <b>Hauptabend-programm</b> präsent sein.“                   |                                      |                                 |                          |                          |                                 |                          |
| „Das Thema Artensterben sollte stärker im <b>Hauptabend-programm</b> präsent sein.“                  | <input type="checkbox"/>             | <input type="checkbox"/>        | <input type="checkbox"/> | <input type="checkbox"/> | <input type="checkbox"/>        | <input type="checkbox"/> |
| „Ich wünsche mir ein <b>tägliches kurzes Update</b> zum Thema Klimawandel.“                          | <input type="checkbox"/>             | <input type="checkbox"/>        | <input type="checkbox"/> | <input type="checkbox"/> | <input type="checkbox"/>        | <input type="checkbox"/> |
| „Ich wünsche mir ein <b>tägliches kurzes Update</b> zum Thema Artensterben.“                         | <input type="checkbox"/>             | <input type="checkbox"/>        | <input type="checkbox"/> | <input type="checkbox"/> | <input type="checkbox"/>        | <input type="checkbox"/> |
| „Beiträge zum Thema Klimawandel sollte einfacher über die <b>Online-Mediatheken</b> zu finden sein.“ | <input type="checkbox"/>             | <input type="checkbox"/>        | <input type="checkbox"/> | <input type="checkbox"/> | <input type="checkbox"/>        | <input type="checkbox"/> |

„Beiträge zum Thema

Artensterben sollte einfacher über  
die **Online-Mediatheken** zu  
finden sein.“

☐☐☐☐☐☐

## Soziodemografie

Nun kommen einige Angaben zu Ihrer Person. Selbstverständlich werden alle Ihre Antworten anonymisiert ausgewertet. Es wird nicht möglich sein, Rückschlüsse auf Ihre Person zu ziehen.

**Sind Sie zurzeit erwerbstätig?** Bitte kreuzen Sie hier die Angabe an, die am ehesten zutrifft (z.B. Schülerin mit Nebenjob => Angabe: Schülerin)

**Single  
choice**

☐

Schüler oder Schülerin

☐

Studentin oder Student

☐

Erwerbstätig

☐

Rentner oder Rentnerin; Pensionärin oder Pensionär

☐

Vorruhestand

☐

Arbeitslos/Arbeit suchend

☐

Hausfrau/Hausmann

☐

Sonstiges

**Viele Leute neigen einer bestimmten politischen Partei zu, die ihnen besonders sympathisch ist. Wie ist das bei Ihnen: neigen Sie einer politischen Partei zu?**

**Single  
choice**

☐

CDU

☐

SPD

☐

CSU

☐

Bündnis90/Grüne

- ☐ FDP
- ☐ Die Linke
- ☐ AfD
- ☐ Andere, und zwar: \_\_\_\_\_
- ☐ Keine Angabe

### Wie hoch ist das monatliche Nettoeinkommen Ihres Haushalts insgesamt?

Mit Netto-Einkommen ist die Summe gemeint, die sich aus Lohn, Gehalt, Einkommen aus selbständiger Tätigkeit, Rente oder Pension jeweils nach Abzug der Steuern und Sozialversicherungsbeiträge ergibt. Rechnen Sie bitte auch die Einkünfte aus öffentlichen Beihilfen, Einkommen aus Vermietung, Verpachtung, Wohngeld, Kindergeld und sonstige Einkünfte hinzu.

Single  
choice

- ☐ Unter 1.000 Euro
- ☐ 1.000 – 2.000 Euro
- ☐ 2.000 – 3.000 Euro
- ☐ 3.000 – 4.000 Euro
- ☐ 4.000 – 5.000 Euro
- ☐ 5.000 – 6.000 Euro
- ☐ 6.000 Euro und mehr

### Abschlusstext

Sie sind nun am Ende unseres Fragebogens angekommen. Wir danken Ihnen vielmals für Ihre Teilnahme!

Möchten Sie gerne noch etwas ergänzen oder sagen?

Textfield, not mandatory

---



---



---



---



---



---



# References

1. Prommer, E. & Linke, C. Ausgeblendet. Frauen im deutschen Film und Fernsehen. Mit einem Vorwort von Maria Furtwängler. *Pub* **65**, 111–113; 10.1007/s11616-019-00545-8 (2020).
