# Supplementary material for: Television's role in Climate Change Communication – Salience and Audiences
Source: Research Square preprint supplement (doi:10.21203/rs.3.rs-6507182/v1), 2025-05-12
Supplement: Supplementary file 1 [file 53923deae4f4c869cd046e62.xlsx]

## Sheet: Table S5
Table S5: Segmentation for Global Warmings Six Germany's- detailed table
	Alarmed	Concerned	Cautious	Disengaged	Doubtful	Dismissive
n (% sample)	378	565	296	29	133	44
	0.26	0.39	0.21	0.02	0.09	0.03
Global Warming Beliefs (according to the Global Warming Six Americas Segmentation procedure)
Global warming isn't happeningI	0%abcd	0%efgh	3%aei	7%bfj	10%cgk	45%dhijk
On average: 3%
Global Warming is caused by natural changes in the environmentI	9%abcde	19%afghi	55%bfj	62%cg	74%dhjk	43%eik
On average: 31%
Global warming is mostly caused by human activitiesI	98%abcde	91%afghi	56%bfjk	45%cglm	12%dhjl	4%eikm
On average: 75%
Degree of certainty	8.4abcde	7.4afghi	5.7bfjk	5.5cgl	4.8dhjm	2.7eijlm
on global warmingII	(1.6)	(2.0)	(2.0)	(1.5)	(2.0)	(2.2)
(Min 1 very uncertain, Max 8 extremely certain)
M=6.9; SD=2.3
Personal harm caused by global warmingII	3.7a-e	2.9afghi	2.3bfjkl	0.2cgjmn	1.7dhkmo	1.2eilno
(Min 0 I don't know, Max 4 very hard)	(0.6)	(0.9)	(0.8)	(0.8)	(0.8)	(0.6)
M=2.8; SD=1.1
Harm caused by global warming for future generationsII	4.0a-e	3.9afghi	3.0bfjkl	0.1cgjmn	1.9dhkmo	1.0eilno
(Min 0 I don't know, Max 4 very hard)	(0.2)	(0.3)	(0.7)	(0.7)	(1.0)	(0.2)
M=3.4; SD=1.0
Point of time of harm caused by Global warming for people in GermanyII	5.8abcde	5.4afghi	4.3bfjk	4.7clm	2.8dhjl	1.6eikm
(Min 1 never, Max 6 now)	(0.7)	(1.0)	(1.4)	(1.8)	(1.5)	(1.1)
M=4.9; SD=1.5
Agreement with statements (Min 1 “There is no climate change.”, Max 5 “Humans can stop climate change, and they will do so successfully”)II	3.7abcd	3.6efgh	3.0aeij	2.8bfkl	2.1cgikm	1.6dhjlm
M=3.3; SD=0.9	(0.7)	(0.7)	(0.8)	(1.0)	(0.6)	(0.7)
Issue Involvement (according to the Global Warming Six Americas Segmentation procedure)
Concern about global warmingII	3.9a-e	3.2afghi	2.6bfjk	2.3cglm	1.7dhjl	1.4eikm
(Min 1 not worried, Max 4 very worried)	(0.4)	(0.5)	(0.6)	(0.8)	(0.7)	(0.8)
M=3.0; SD=0.9
How much had you thought about global warming before today?II	3.7a-e	3.0afghi	2.5bfjkl	1.9cgj	2.1dhk	1.8eil
(Min 1 Not at all, Max 4 a lot)	(0.5)	(0.5)	(0.7)	(0.9)	(0.9)	(0.9)
M=2.9; SD=0.9
Personal importance of the topic global warmingII	4.4a-e	3.4afghi	2.7bfjkl	2.1cgjm	1.8dhk	1.4eilm
(Min 1 not at all important, Max 5 extremely important)	(0.6)	(0.6)	(0.8)	(0.9)	(0.8)	(0.8)
M=3.3; SD=1.3
Agreement with the statement “I could easily change my mind about global warming.”II	3.4a-c	2.7ade	2.5bfg	2.7chi	3.2dfh	3.6egi
(Min 1 strongly agree, Max strongly disagree)	(0.9)	(0.8)	(0.7)	(0.8)	(0.8)	(0.7)
M=2.9; SD=0.9
How many of your friends share your views on global warming?II	3.9a-e	3.3afg	2.8bfh	2.3cgij	3.1dhi	3.2ej
(Min 1 none, Max 5 all)	(0.8)	(0.9)	(0.9)	(0.9)	(0.9)	(1.3)
M=3.3; SD=1.0
Behavior (according to the Global Warming Six Americas Segmentation procedure)
Over the past 12 months, how many times have you punished companies that are opposing steps to reduce global warming by NOT buying their products?II	2.5a-e	1.3a	1.3bfg	0.8c	1.1df	1.1eg
(Min 0 i don't know, 5 many times)	(1.7)	(1.3)	(1.1)	(1.0)	(0.7)	(0.4)
M=1.6; SD=1.5
Policy Preferences (according to the Global Warming Six Americas segmentation procedure)
Priority of global warming for the next federal electionII	3.7a-e	2.8afghi	2.0bfjk	1.7cg	1.3dhj	1.5eik
(Min 1 low, Max 4 very high)	(0.5)	(0.7)	(0.7)	(0.7)	(0.6)	(0.8)
M=2.7; SD=1.0
Citizens should be doing more or less to address global warmingII	4.7a-e	3.9afghi	3.2bfjk	3.2cglm	2.5dhjln	1.9eikmn
(Min 1 much less, Max 5 much more)	(0.5)	(0.7)	(0.8)	(0.7)	(0.8)	(1.0)
M=3.8; SD=1.0
Germany should reduce greenhouse gas emissions on its ownII	3.7a-e	3.0afghi	2.2bfjk	1.5cg	1.6dhjl	1.2eikl
(Min 0 i don't know, max 5 regardless of what other countries do)	(0.8)	(1.2)	(1.1)	(1.5)	(1.1)	(0.7)
M=2.8; SD=1.0
Demography (additional information, not part of the segmentation procedure)
EducationIII	Secondary school	Secondary school	Secondary school	Secondary school	Secondary school	Secondary school
(Min 0 no degree, Max 6 studies)	0.25	0.31	0.39	0.48	0.45	0.3
Secondary school without Abitur (Realschulabschluss/Mittlere Reife/Oberschule) or equivalent qualification (33%)
SexIII	Female	Male	Male	Female	Male	Male
Male (50%)	0.57	0.5	0.57	0.62	0.61	0.55
IncomeIII	2000-3000€	2000-3000€	2000-3000€	Below 1000€	2000-3000€	2000-3000€
(Min Below 1000€, Max 6000€ and more)	0.23	0.24	0.27	0.35	0.23	0.3
2000-3000€ (24%)
AgeII	42.0	42.5	41.6	46.7	46.0	45.6
M=42.7; SD=15.5	(16.3)	(15.7)	(15.3)	(12.4)	(13.8)	(14.5)
GenerationsIII	Generation X	Generation Y	Generation Y	Generation X	Generation X	Generation Y
Generation X (29%)	0.29	0.29	0.31	0.35	0.38	0.36
Media use (not part of the segmentation procedure)
Watching TVI	Daily or almost daily	Daily or almost dailya	Daily or almost dailya	Daily or almost daily	Daily or almost daily	Daily or almost daily
(Min 1 daily or almost daily, Max 5 Information source is not available)	0.74	0.74	0.67	0.75	0.67	0.66
Daily or almost daily (72%)
Internet TVI	Rarer	Rarer	Rarer	Daily or almost daily	Rarer	Rarer
(Min 1 daily or almost daily, Max 5 Information source is not available)	0.35	0.35	0.38	0.42	0.33	0.35
Rarer (35%)
Internet useI	Daily or almost dailyab	Daily or almost dailycd	Daily or almost dailyac	Daily or almost daily	Daily or almost dailybd	Daily or almost daily
(Min 1 daily or almost daily, Max 5 Information source is not available)	0.93	0.93	0.8	0.89	0.81	0.86
Daily or almost daily (89%)
Social mediaI	Daily or almost daily	Daily or almost dailya	Daily or almost daily	Daily or almost daily	Daily or almost dailya	Daily or almost daily
(Min 1 daily or almost daily, Max 5 Information source is not available)	0.64	0.67	0.59	0.65	0.5	0.46
Daily or almost daily (62%)
RadioI	Daily or almost daily	Daily or almost dailya	Daily or almost dailyb	Daily or almost daily	Daily or almost dailyab	Daily or almost daily
(Min 1 daily or almost daily, Max 5 Information source is not available)	0.52	0.49	0.43	0.41	0.45	0.48
Daily or almost daily (48%)
Printed press productsI	Rarera	Rarera	Rarer	Rarer	Rarer	Rarer
(Min 1 daily or almost daily, Max 5 Information source is not available)	0.32	0.41	0.35	0.48	0.28	0.44
Rarer (36%)
Frequency of news consumptionI	Between 2-5 times dailya-d	Between 2-5 times dailyae	Between 2-5 times dailyb	Between 2-5 times dailyc	Between 2-5 times dailyde	Between 2-5 times daily
(Min 1 more than 10 times daily, Max 9 never)	0.54	0.43	0.38	0.42	0.34	0.38
Between 2-5 times daily (43%)
FictionI	Often and sometimes	Sometimes	Sometimes	Often	Sometimes	Often
(Min often, Max 4 never)	0.34	0.37	0.38	0.38	0.35	0.41
Sometimes (36%)
RealityI	Never	Never	Never	Never	Never	Never
(Min 1 often, Max 4 never)	0.65	0.62	0.52	0.61	0.62	0.6
Never (61%)
SeriesI	Sometimesa	Rarely	Rarely	Rarely	Rarelya	Sometimes and never
(Min 1 often, Max 4 never)	0.35	0.35	0.32	0.36	0.34	0.27
Sometimes (32%)
Private news channelsI	Never	Rarely	Sometimes	Never	Never	Never
(Min 1 often, Max 4 never)	0.27	0.27	0.29	0.35	0.35	0.38
Sometimes and rarely (26%)
Non_Fiction_Sum_broadI	11.2a	11.6b	11.6c	12.5	12.3abc	12.1
(Min 2, Max 16)	(2.8)	(2.7)	(2.6)	(3.0)	(2.9)	(3.2)
M=11.6; SD=2.8
Non_Fiction_Sum_preciseI	8.8ab	9.1	9.0cd	9.6	9.6ac	9.6bd
(Min 1, Max 11)	(2.4)	(2.2)	(2.1)	(2.3)	(2.3)	(2.7)
M=9.0; SD=2.3
Information_Sum_broadI	16.4a-d	17.8aef	18.6b	20.7	19.5ce	19.0df
(Min 3, Max 28)	(5.5)	(4.4)	(4.7)	(5.2)	(5.2)	(6.0)
M=17.8; SD=4.9
Information_Sum_preciseI	13.8a-d	15.3aef	16.2bg	15.8	16.7ce	16.3dfg
(Min 3, Max 24)	(4.4)	(3.9)	(4.1)	(4.6)	(4.6)	(5.3)
M=15.3; SD=4.3
Time_IndexI	260.9a	264b	269.9	348.2	273.9	327.8ab
(Min 61, Max 1450)	(151.9)	(137.6)	136.3)	(299.2)	(164.8)	(263.1)
M=268.3; SD=152.9
Topicavoidance_high _IndexI	2.3a-d	2.5aefg	2.9be	2.4	2.9cf	3.1dh
(Min 1, Max 5)	(0.9)	(0.8)	(0.9)	(0.9)	(1.0)	(1.1)
M=2.6; SD=0.9
Topicannoyance_low_IndexI	2.3a-d	3.0aefgh	3.4beij	3.8f	4.0cgi	4.3dhj
(Min 1, Max 5)	(0.9)	(0.9)	(1.0)	(1.0)	(1.0)	(1.0)
M=3.0; SD=1.1
Topicannoyance_high_IndexI	1.8a-e	2.4afgh	3.2bfij	3.0c	3.8dgi	3.9ehj
(Min 1, Max 5)	(0.9)	(0.9)	(0.9)	(0.8)	(0.9)	(1.0)
M=2.6; SD=1.1
This table displays descriptive statistics for group comparisons across the six audience segments identified using the Six Americas short-form instrument (Leiserowitz et al., 2022). Each variable was assigned to one of three test types, as indicated in the table: (I) Chi-square test for categorical variables, (II) Welch’s ANOVA followed by Games-Howell post-hoc test for metric variables, (III) No…
