# Supplementary material for: Television's role in Climate Change Communication – Salience and Audiences
Source: Research Square preprint supplement (doi:10.21203/rs.3.rs-6507182/v1), 2025-05-12
Supplement: Supplementary file 2 [file f9af1434619fb2ffdee30fe6.xlsx]

## Sheet: Table S7
Table S7: Representatives of social groups in the field of climate change
Social movements and NGOs
Social movements
Fridays-For-Future		Greta Thunberg
		Carla Reemtsma
		Luisa Neubauer
	Press spokesperson	Quang-Anh Paasch
Scientists-For-Future		Gregor Hagedorn
		Detlev Ganten
		Maja Göpel
		Karen Wiltshire
		Volker Quaschning
Extinction Rebellion		Annemarie Botzki
		Susanne Egli
		Nora Schareika
		Manon Gerhardt
NGOs
Greenpeace	Spokeswoman Climate and Energy Transition	Tina Loeffelbein
	Management Board	Martin Kaiser
BUND	Chairman	Olaf Bandt
	Spokeswoman	Petra Kirberger
NABU	President	Jörg-Andreas Krüger
	Spokesman	Roland Panter
Deutsche Umwelthilfe	Chairman	Prof. Dr. Harald Kächele
	Spokesman	Matthias Walter
WWF Deutschland		Christoph Heinrich
	Spokeswoman	Corinna Seide
Robin Wood	Spokesman of the Board	Jonathan Schultz
	Spokeswoman	Ute Bertrand
Deutscher Naturschutzring	Managing Director	Florian Schöne
	Spokesman	Thorsten Greb
Politics
German Bundestag	President of the German Bundestag	Bärbel Bas
	Presidium of the German Bundestag SPD	Aydan Özuguz
	Presidium of the German Bundestag CDU/CSU	Yvonne Magwas
	Presidium of the German Bundestag Bündnis 90/Die Grünen	Katrin Göring-Eckardt
	Presidium of the German Bundestag FDP	Wolfgang Kubicki
	Presidium of the German Bundestag Die Linke	Petra Pau
	SPD (Parliamentary leader)	Rolf Mützenich
	CDU/CSU (Parliamentary leader)	Friedrich Merz
	Bündnis 90/Die Grünen (Parliamentary leader)	Katharina Dröge,
		Britta Haßelmann
	FDP (Parliamentary leader)	Christian Dürr
	AfD (Parliamentary leader)	Alice Weidel
		Tino Chrupalla
	Die Linke (Parliamentary leader)	Amira Mohamed Ali,
		Dietmar Bartsch
German Bundesrat	President	Bodo Ramelow
	1. Vice President	Reiner Haseloff
	2. Vice President	Peter Tschentscher
Dt. Städte- und Gemeindebund	President	Ralph Spiegler
German Federal Government	Chancellor	Olaf Scholz
	Federal Minister for Economic Affairs and Climate Protection,	Robert Habeck
	Vice Chancellor
	Federal Minister of Finance	Christian Lindner
	Federal Minister of the Interior and Home Affairs	Nancy Faser
	Federal Minister of Education and Research	Bettina Stark-Watzinger
	Federal Foreign Office	Annalena Baerbock
	Federal Minister of Justice	Marcus Buschmann
	Federal Minister of Labour and Social Affairs	Hubertus Heil
	Federal Minister of Defence	Christine Lambrecht
	Federal Minister of Food and Agriculture	Cem Özdemir
	Federal Minister for Family Affairs, Senior Citizens, Women and Youth	Lisa Paus
	Federal Minister of Health	Karl Lauterbach
	Federal Minister for Digital Affairs and Transport	Volker Wissing
	Federal Minister for Economic Cooperation and Development	Svenja Schulze
	Federal Minister for Housing, Urban Development and Construction	Klara Geywitz
	Federal Chancellery	Wolfgang Schmidt
State governments	Prime Minister Sachsen-Anhalt	Dr. Reiner Haseloff
	Prime Minister Baden-Württemberg	Winfried Kretschmann
	Prime Minister Rheinland-Pfalz	Malu Dreyer
	Prime Minister Niedersachsen	Stephan Weil
	Prime Minister Brandenburg	Dr. Dietmar Woidke
	Prime Minister Thüringen	Bodo Ramelow
	Prime Minister Schleswig-Holstein	Daniel Günther
	Prime Minister Mecklenburg-Vorpommern	Manuela Schwesig
	Prime Minister Sachsen	Michael Kretschmer
	Prime Minister Bayern	Markus Söder
	First Mayor Hamburg	Dr. Peter Tschentscher
	Mayor Bremen	Andreas Bovenschulte
	Prime Minister Nordrhein-Westfalen	Hendrik Wüst
	Governing Mayor Berlin	Franziska Giffey
	Prime Minister Saarland	Anke Rehlinger
	Prime Minister Hessen	Boris Rhein
International organisations	UNO Secretary General	António Guterres
	President EU Commission	Ursula von der Leyen
Trade associations and insurance companies [1]
Industrie und Handelskammern (IHK)	President	Peter Adrian
Bundesverband der Deutschen Industrie (BDI)	President	Siegfried Russwurm
Bundesverband der Energie- und Wasserwirtschaft	Chief Executive Officer	Kerstin Andreae
Bankenverband online	Chief Executive Officer	Christian Ossig
DGB Deutscher Gewerkschaftsbund	Chairperson	Yasmin Fahimi
Bundesverband Solarwirtschaft		Joachim Goldbeck
		Moritz Ritter
Verband der Automobilindustrie (VDA)	Presidium	Hildegard Müller
Bundesverband Digitale Wirtschaft	Presidium	Dirk Freytag
Bundesverband WindEnergie (BWE)	Managing Director	Wolfram Axthelm
Deutsche Bauindustrie	President	Peter Hübner
BVE (Bundesverband der deutschen Ernährungsindustrie)	Chairperson	Dr. Christian von Boetticher
Deutscher Industrie und Handelskammertag	Chief Executive Officer	Martin Wansleben
Deutscher Bauernverband	President	Joachim Rukwied, Präsident
Münchner Rück	Chairman of the Management Board	Dr. Joachim Wenning
Law
Bundesverfassungsgericht	President	Stephan Harbarth
EGMR Europäischen Gerichtshof für Menschenrechte	Chairperson	Róbert Ragna Spanó
Culture and religion
Bund der Evangelischen Kirche Deutschland	Council Chairperson	Annette Kurschus
Deutsche Bischofskonferenz (roman-catholic)	Chairperson	Georg Bätzing
Zentralkomitee der deutschen Katholiken (roman-catholic)	President	Dr. Irme Stetter-Karp
Zentralrat der Muslime Deutschland	President	Aiman A. Mazyek
Zentralrat der Juden Deutschland	President	Josef Schuster
Naturkundemuseum Berlin		Gregor Hagedorn
Klimahaus Bremerhaven		Arne Dunker
Deutscher Kulturrat		Christian Höppner
Frankfurter Buchmesse	President	Jürgen Boos
Leipziger Buchmesse	President	Oliver Zille
Science
Deutsches Klimakonsortium		Astrid Kiendler-Scharr,
		Anita Engels,
		Tobias Fuchs,
		Mark Lawrence,
		Mojib Latif
Alfred Wegener Institute Bremerhafen		Antje Boetius
PIK		Hans Joachim Schellnhuber,
		Stefan Rahmstorf,
		Otmar Georg Edenhofer
CLICCS Uni Hamburg		Detlef Stammer,
		Klaus Hasselmann
MARUM	Director	Michael Schulz
The Future Ocean	Speaker	Nele Matz-Lück
Club of Rome		Christian Berg,
		Claudia Kemfert,
		Thomas Bruhn
IPCC[2]		Hans-Otto Pörtner,
		Jochem Marotzke,
		Dirk Notz,
		Daniela Schmidt,
		Diana Reckien,
		Jörn Birkmann,
		Jan Minx,
		Felix Creutzig,
		Silvia Kreibiehl
IPBES		Stephanie Thomas,
		Josef Settele,
		Almut Arneth,
		Julian Gutt,
		Ralf Seppelt,
		Ute Jacob,
		Jens Jetzkowitz,
		Thomas Hickler
Meteorology
Climate Service Center Hamburg	Director	Prof. Dr. Daniela Jacob
Deutscher Wetterdienst		Gerhard Adrian
Kachelmannwetter		Jörg Kachelmann
[1] https://www.deutschland.de/de/topic/wirtschaft/globalisierung-welthandel/kammern-und-verbaende
[2] https://www.de-ipcc.de/354.php
